# Supplementary material
Source: publisher site journal article supplement (https://www.dovepress.com/article/329770)
Supplement: Supplementary file 1 [file get_supplementary_file.php]

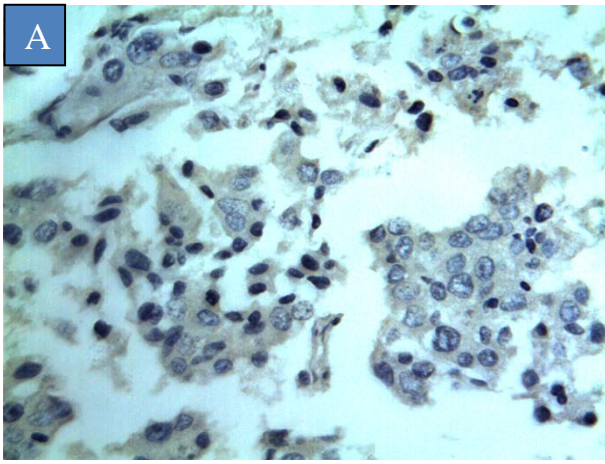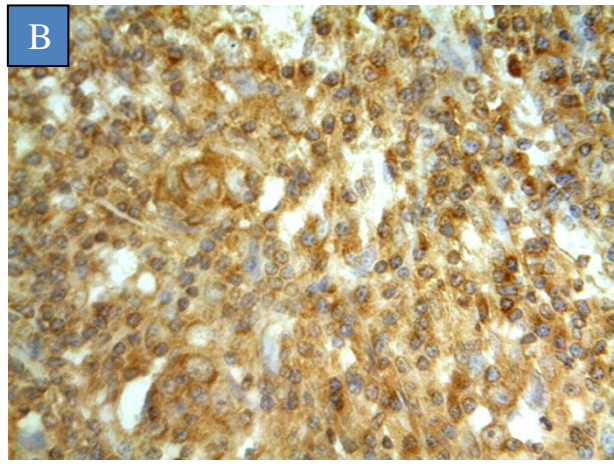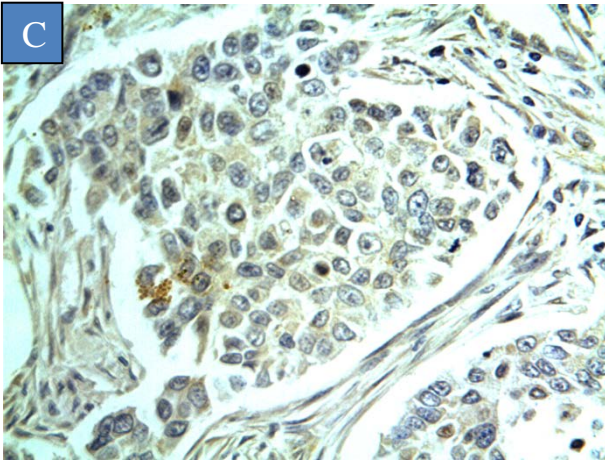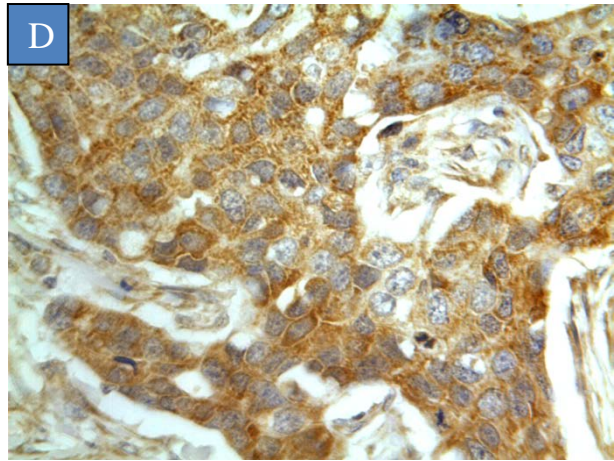

**Figure S1.** CYP4Z1 expression in different types of experimental controls. (A) No CYP4Z1 staining in TNBC tissue incubated with normal goat serum instead of CYP4Z1 primary antibody (negative control), (B) High CYP4Z1 expression was observed in TNBC tissue incubated with CYP4Z1 primary antibody, (C) No expression of CYP4Z1 was demonstrated in TNBC tissue incubated with mixture of primary antibody and blocking peptide, and (D) High CYP4Z1 expression was observed in breast cancer tissue incubated with CYP4Z1 primary antibody (positive control). Magnification (x400).
